# Supplementary material
Source: PubMed Central journal article supplement (PMC4019041)
Supplement: NIHMS563474-supplement-Figure_1.pdf [file NIHMS563474-supplement-Figure_1.pdf]

**Supplementary Figure 1**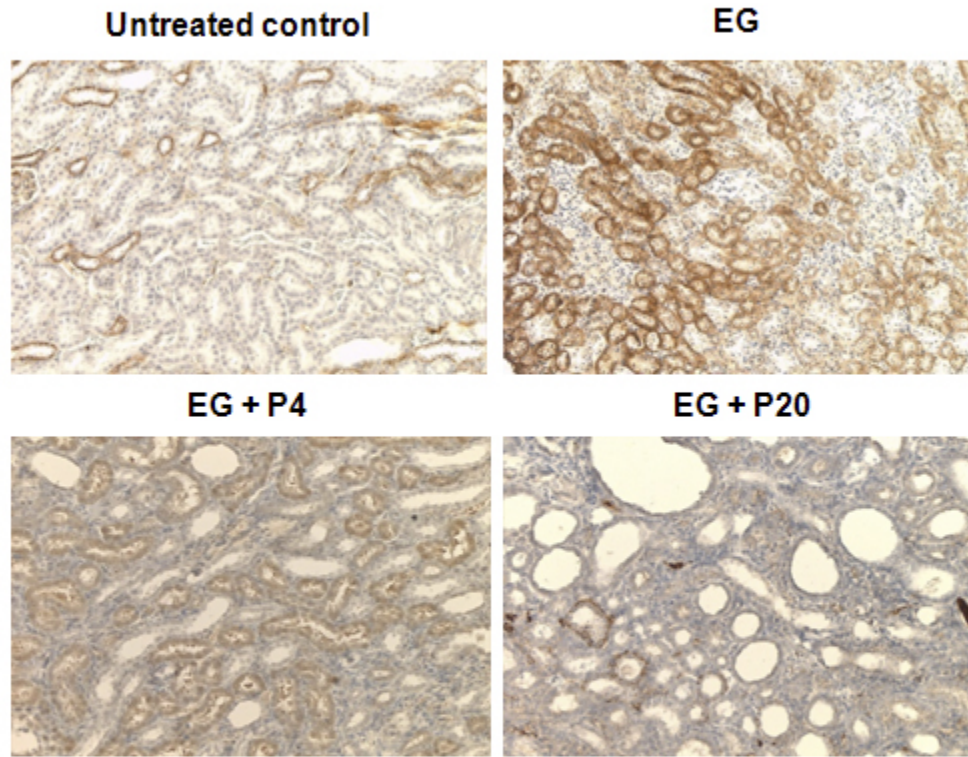

**Supplementary Figure 1. Effect of PGG on osteopontin (OPN) expression in EG/AC treated rat kidneys.** Immunohistochemical staining for renal OPN expression in EG/AC treated kidneys (n=6/group) obtained on day 21 following EG/AC treatment.
